# Supplementary material for: Ionic liquid-assisted thermal decomposition synthesis of carbon dots and graphene-like carbon sheets for optoelectronic application
Source: Royal Society of Chemistry journal article supplement (doi:10.1039/c6ra14181a), 2016-01-01
Supplement: c6ra14181a1.pdf [file c6ra14181a1.pdf]

## Supporting Information

### Ionic Liquid-Assisted Thermal Decomposition Synthesis of Carbon Dots and Graphene-like Carbon Sheets for Optoelectronic Application

Jia-Yun Wan, Ze Yang, Zhong-Guo Liu and Hang-Xing Wang\*

#### Supporting Figures

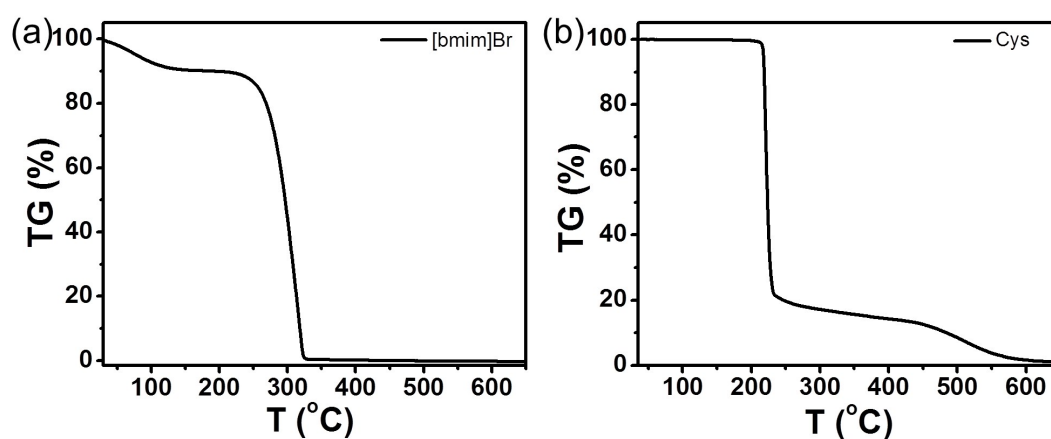

**Figure S1.** The thermo gravimetry analysis (TGA) curves of (a) [bmim]Br and (b) L-cys, which give the optimal reaction temperature range for the preparation.

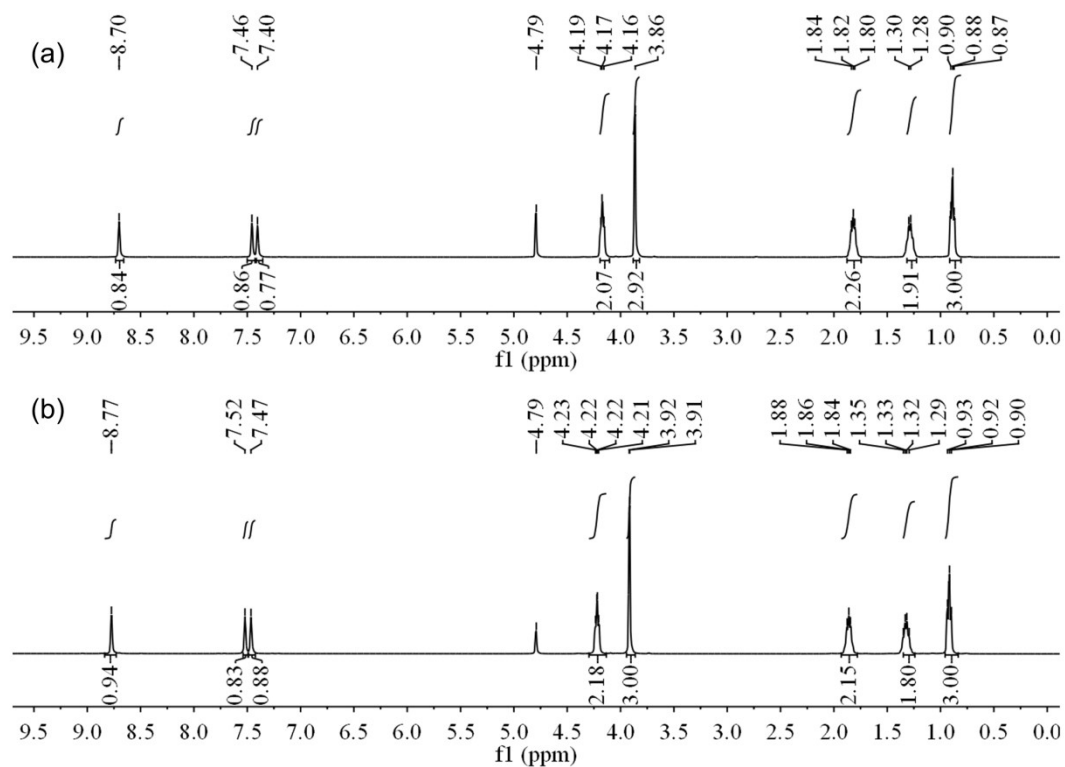

**Figure S2.**  $^1\text{H}$  NMR (400 MHz,  $\text{D}_2\text{O}$ ) spectra of 1-butyl 3-methyl imidazolium bromide before (a) and after (b) heating treatment at 240 °C for 120 minutes.

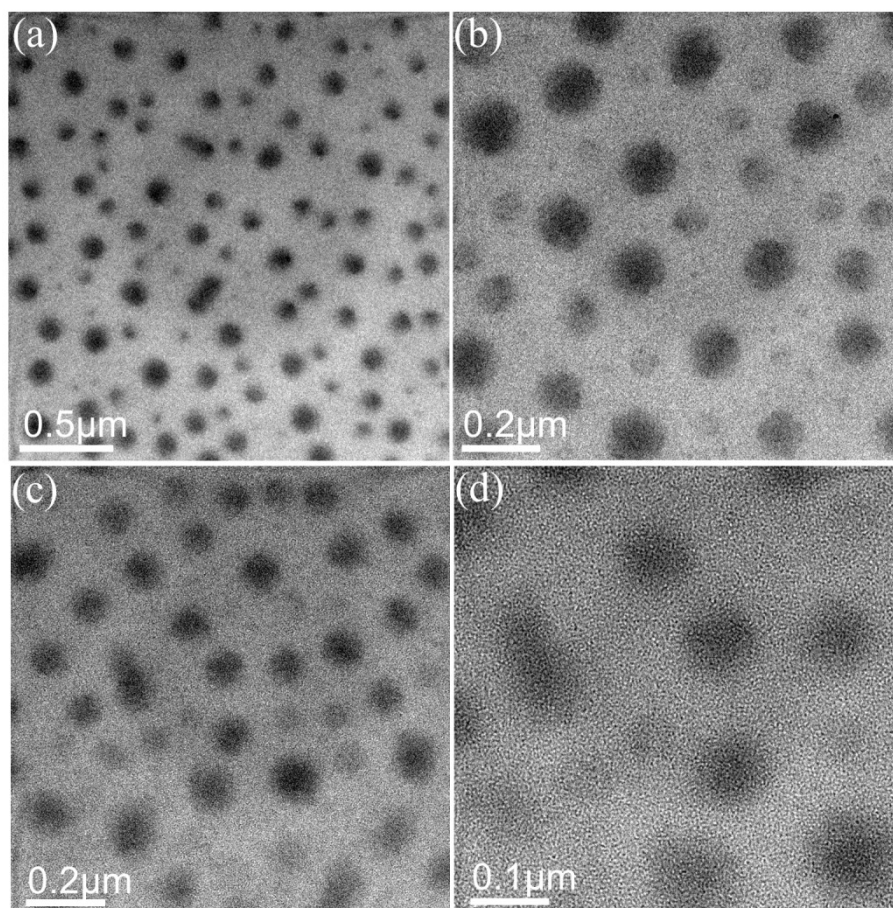

**Figure S3.** TEM images of the as-prepared CD with using L-cys as precursor. The sample was prepared by thermal decomposition of L-cys at 240 °C for 30 min and then purified by column chromatography.

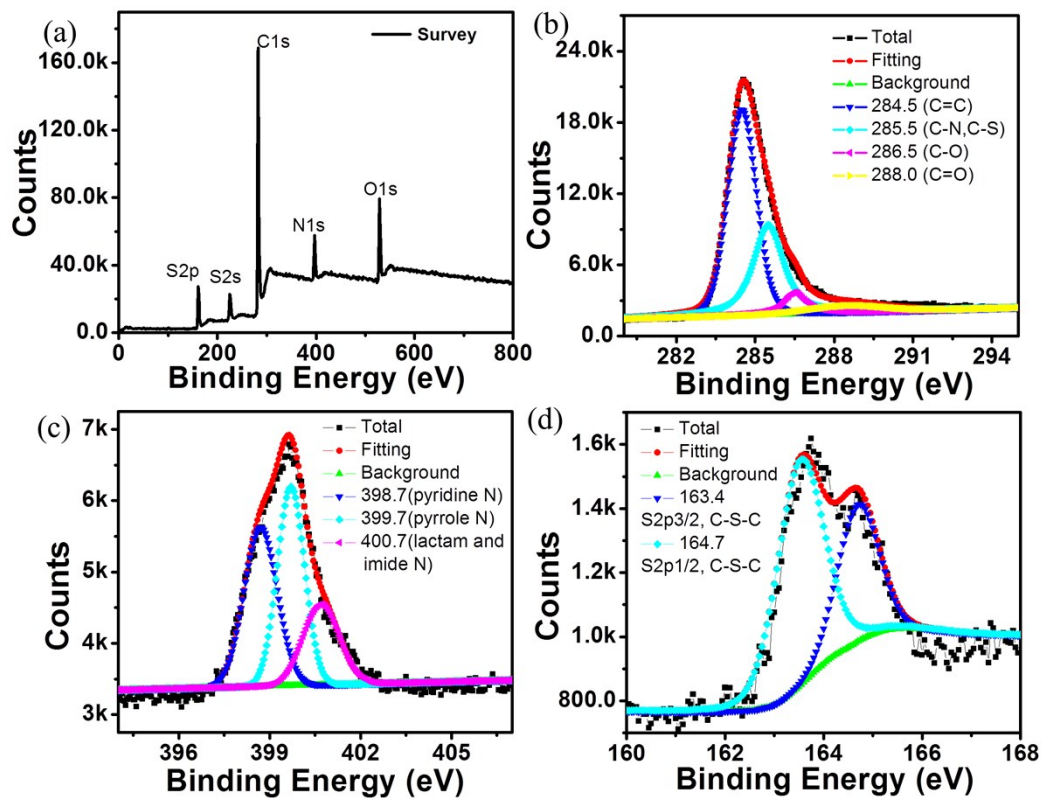

**Figure S4.** (a) XPS survey spectrum of flake structural CS that is prepared from L-cys. (b-d) High-resolution (b) C1s, (c) N1s, and (d) S<sub>2p</sub> peaks of CD. The sample was prepared by thermal decomposition of L-cys at 240 °C for 30 min and then purified by column chromatography.

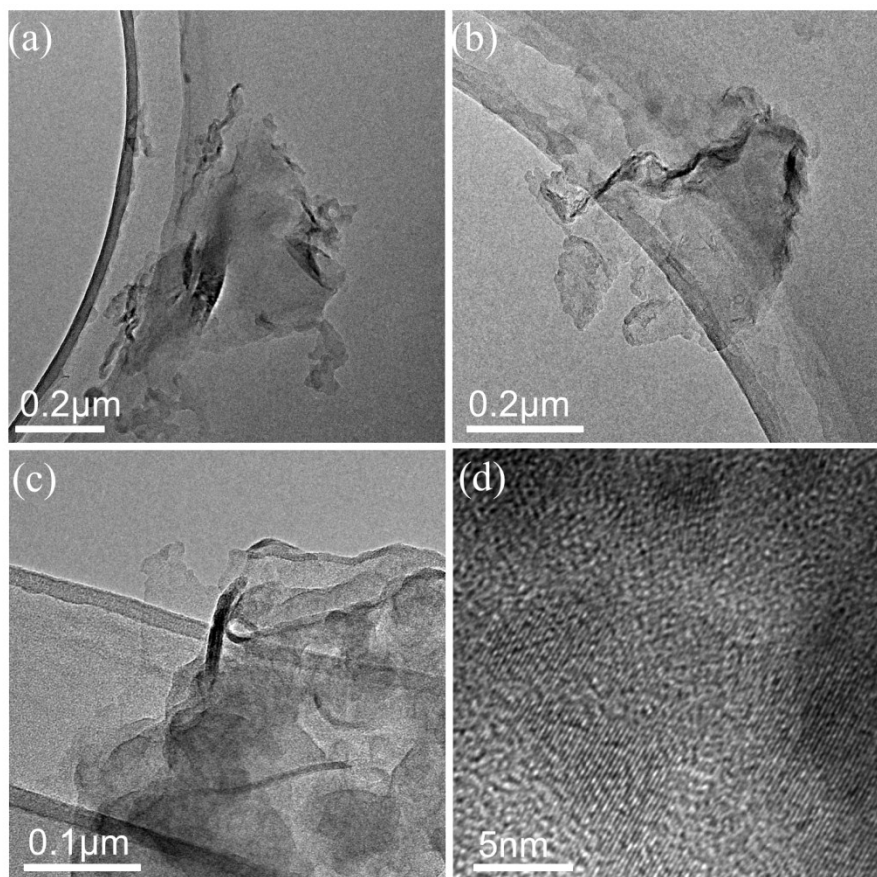

**Figure S5.** TEM images of the as-prepared CS with using L-cys as precursor. The sample was prepared by thermal decomposition of L-cys at 240 °C for 30 min and then purified by filtration.

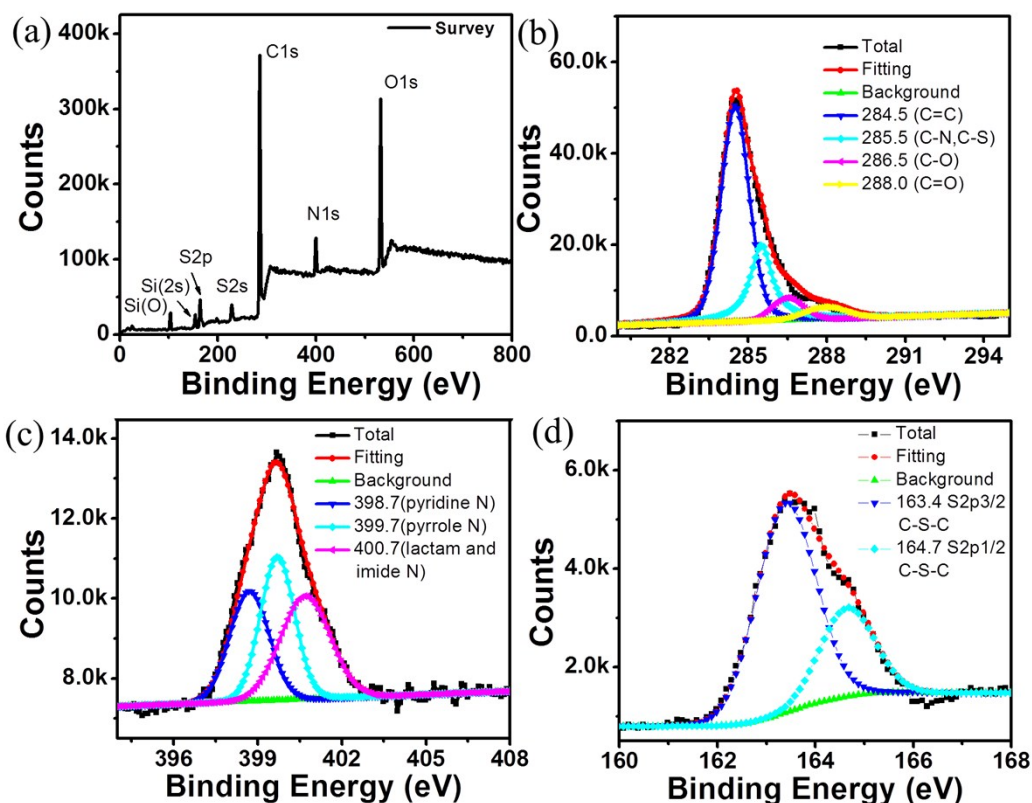

**Figure S6.** (a) XPS survey spectrum of flake structural CS that is prepared from L-cys. (b-d) High-resolution (b)  $C_{1s}$ , (c)  $N_{1s}$ , and (d)  $S_{2p}$  peaks of CS. The sample was prepared by thermal decomposition of L-cys at 240 °C for 30 min and then purified by filtration.

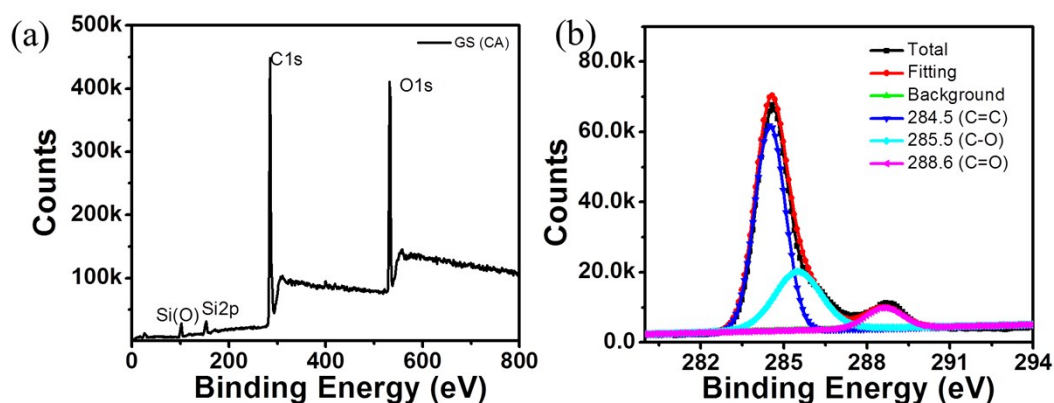

**Figure S7.** XPS survey spectrum (a) and the deconvolution of  $C_{1s}$  spectrum (b) of the prepared CS with using citric acid as precursor. The sample was prepared by thermal decomposition of citric acid at 210 °C for 30 min and then purified by filtration.

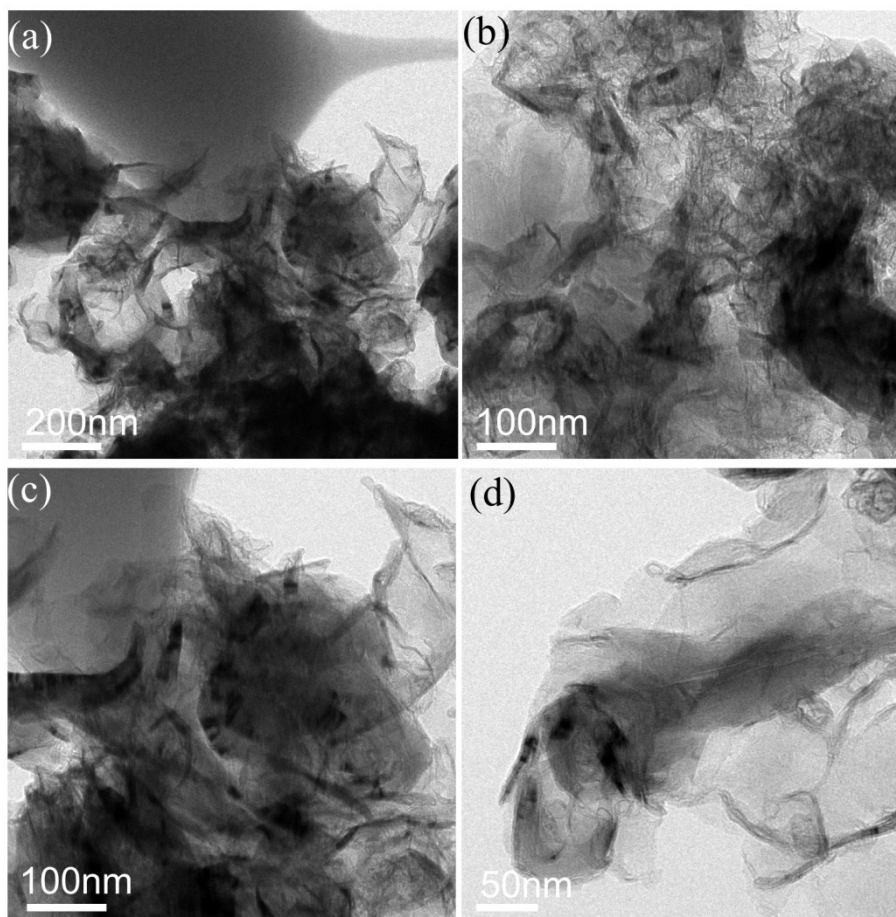

**Figure S8.** TEM images of the as-prepared CS with using citric acid as precursor. The sample was prepared by thermal decomposition of citric acid at 210 °C for 30 min and then purified by filtration.

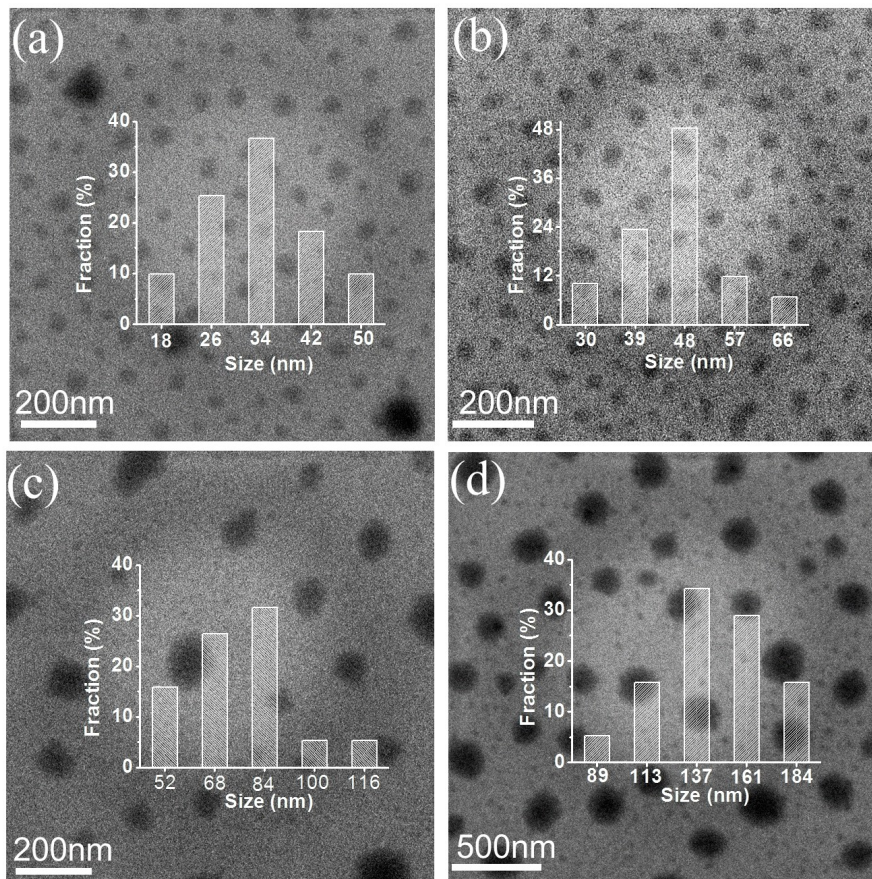

**Figure S9.** TEM images for CD prepared by thermal decomposition of L-cys at 240 °C with duration time of 5 min, 10 min, 30 min and 60 min, respectively.



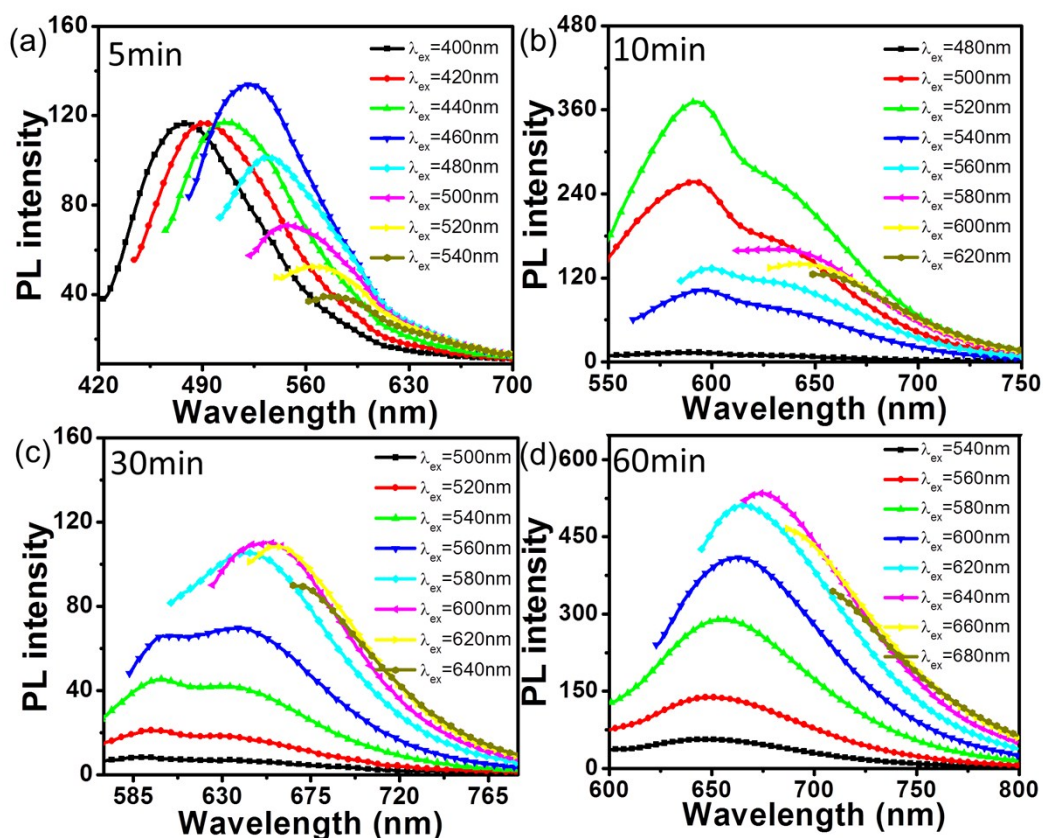

**Figure S10.** PL spectra for samples thermal decomposition prepared at 240 °C for different durations (5 min, 10 min, 30 min and 60 min). All the samples were dispersed in EtOH and without further treatment.

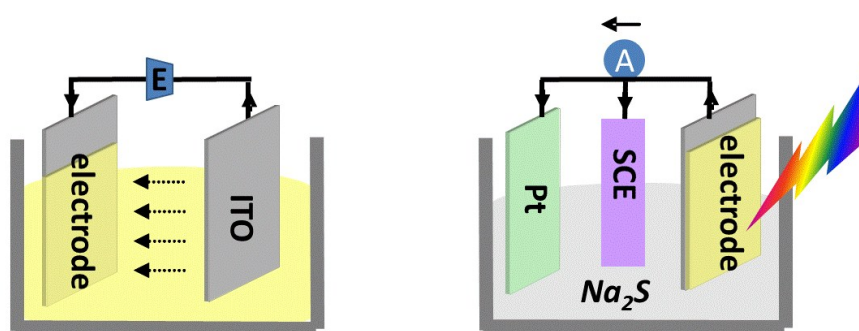

**Scheme S1.** (a) Illustration of the electro-deposition of CD, CS and CD/CS onto ITO substrates for preparation of photoelectrodes. (b) A PEC cell with three-electrode configuration was constructed in this work.

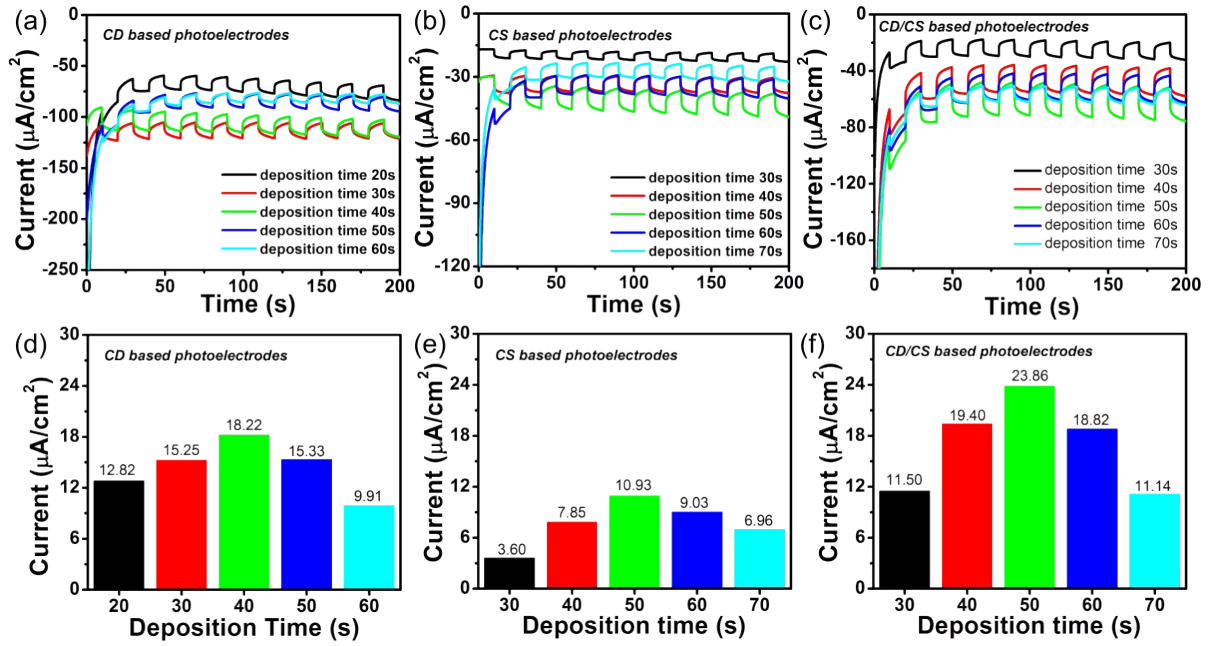

**Figure S11.** (a-c) Photogenerated current responses versus light on/off cycle time profiles of the (a) CD, (b) CS, and (c) CD/CS hybrid photoelectrodes, respectively. (d-f) Statistical graphs of photogenerated current of the (d) CD (d), (e) CS (e), (f) and CD/CS photoelectrodes, respectively.
